# Supplementary material
Source: PubMed Central journal article supplement (PMC3162213)
Supplement: NIHMS208091-supplement-01.pdf [file NIHMS208091-supplement-01.pdf]

## Supplemental materials legend

1. Legend
2. Supplemental Figure 1
3. Supplemental Figure 2
4. Supplemental Figure 3
5. Supplemental Figure 4
6. Supplemental Figure 5
7. Supplemental figure legends
8. ChIP-PCR primer sequences
9. Supplemental movie

## Supplemental materials legend

1. Legend
2. Supplemental Figure 1
3. Supplemental Figure 2
4. Supplemental Figure 3
5. Supplemental Figure 4
6. Supplemental Figure 5
7. Supplemental figure legends
8. ChIP-PCR primer sequences
9. Supplemental movie

**Figure S1**

**A**

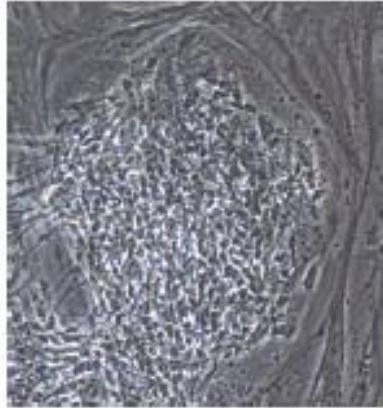

**B**

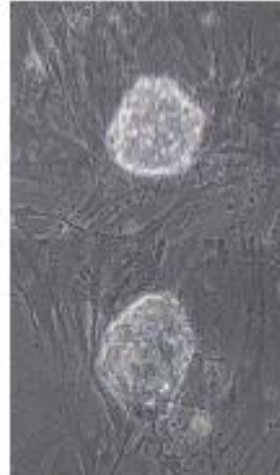

Figure S2

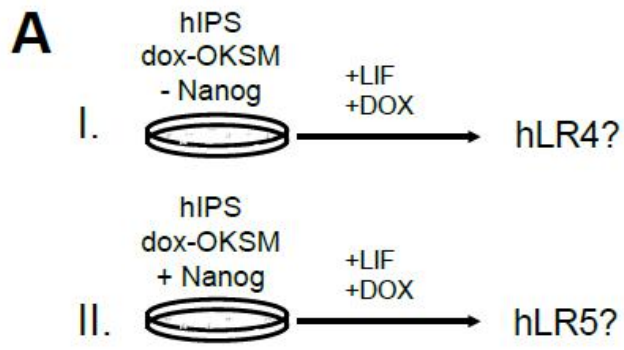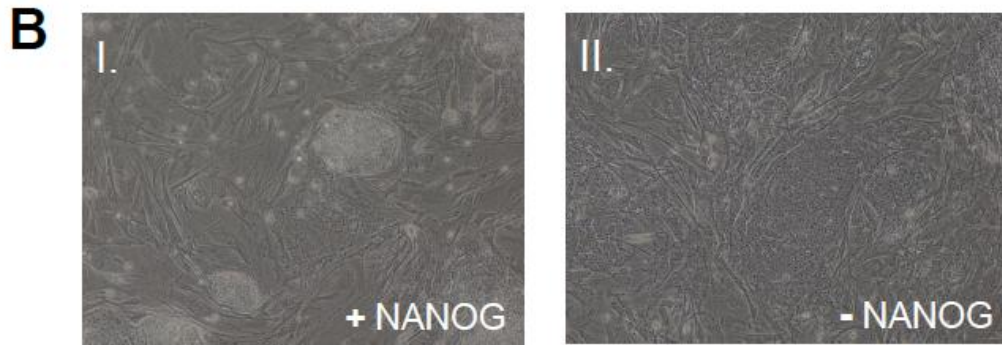

Figure S3

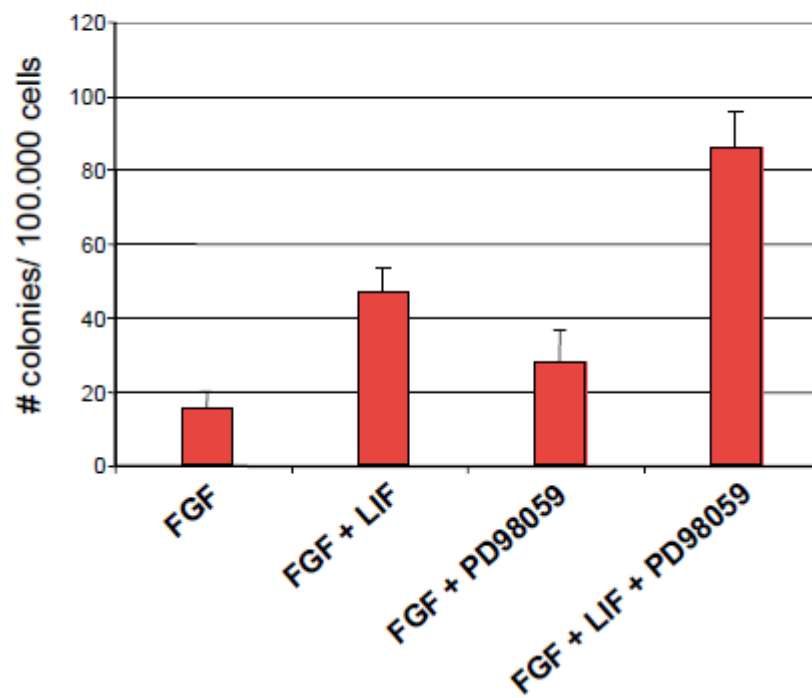

**Figure S4**

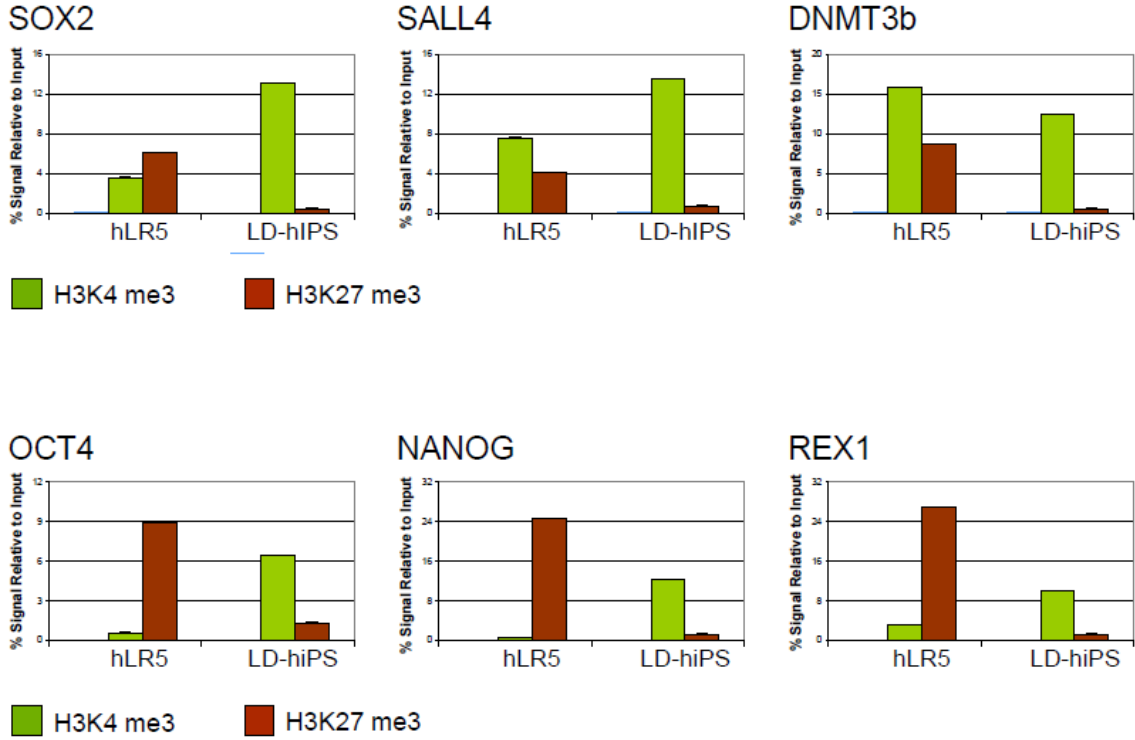

Figure S5

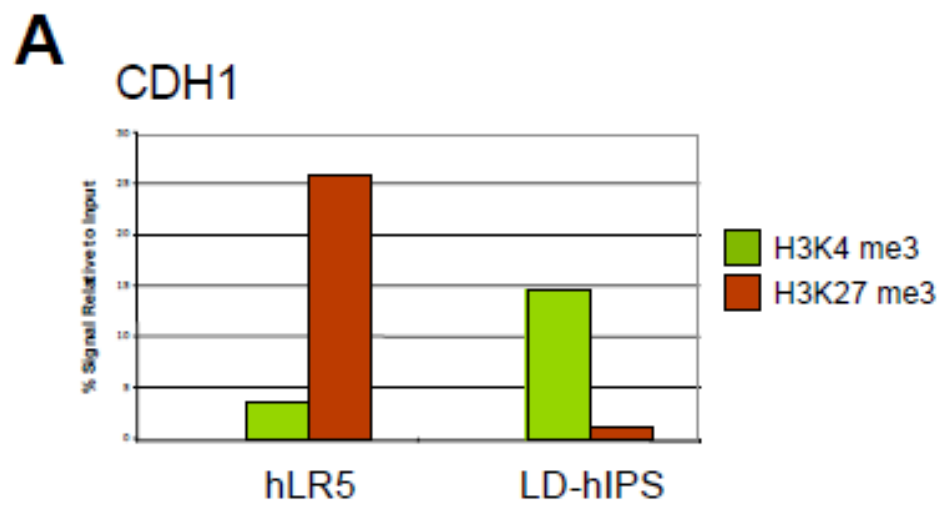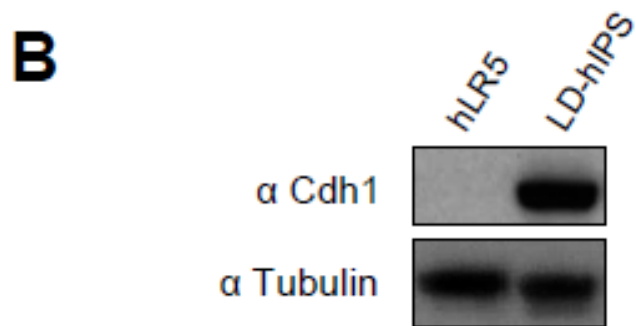

Figure S1: Colony morphologies during the derivation of hLR5 cells.

A: Typical irregular colony morphology of colonies that appear early and cannot be propagated after picking. B: Morphology of emerging hLR5 colonies.

Figure S2: Direct conversion of existing hiPS cells into hLR5 cells. A: Schematic representation of the conversion of hiPS cells into hLR5 cells in the absence (top panel) or presence (bottom panel) of ectopic NANOG. B. Morphology of the iPS cells after 3 trypsin passages in hLR5 media in the presence (left panel) or absence (right panel) of NANOG

Figure S3: Conversion rate of hLR5 cells into LD-hiPS cells is influenced by growth factors and inhibition of MEK signaling. Bar graph indicates the average number of stable pluripotent LD-hiPS colonies obtained after plating of 100,000 hLR5 cells in the presence of the indicated combinations of growth factors and MEK inhibitor (PD98059, 50  $\mu$ M).

Figure S4: Reactivation of pluripotency mediators upon hLR5 to LD-hiPS conversion  
Chromatin immunoprecipitation and quantitative PCR analysis of the presence of Histone 3 lysine 4 (H3K4, green bars) marks and Histone 3 Lysine 27 (H3K27, red bars) marks at the promoter regions of Sox2, Sall4, Dnmt3b, Oct4, NANOG and Rex1 as indicated in hLR5 cells and LD-hiPS cells.

Figure S5: Reactivation of E-Cadherin upon hLR5 to LD-hiPS conversion

A: Chromatin immunoprecipitation and quantitative PCR analysis of the presence of Histone 3 lysine 4 (H3K4, green bars) marks and Histone 3 Lysine 27 (H3K27, red bars) marks at the E-Cadherin (Cdh1) promoter in hLR5 cells and LD-hiPS cells as indicated.  
B: Western blot analysis of E-Cadherin (Cdh1) expression in hLR5 cells and LD-hiPS cells as indicated.



ChIP-PCR primer sequences

| Promotor     | forward              | reverse               |
|--------------|----------------------|-----------------------|
| Oct4         | AAAGCAATCCTTCTGCTCCA | TAACATAGCAAGGCCCCATC  |
| Sox2         | GCGTCCCATCCTCATTTAAG | GCCTTTTCGAAGGAAGTGG   |
| Nanog        | CACGGCCTCCCAATTTACT  | TGGTTCAACAGGAATGGGATA |
| Zfp42 (Rex1) | TCCGGCCTAAAAGGGTAAAT | GTTGGCACGTGGTGAGC     |
| Zfp42 (Rex1) | CGCGTCCGGCCTAAA      | GGCAGCGCCTCCAGA       |
| DNMT3b       | GTCCAAAGCAGGATGACAGG | GCACCAGAGTCTCCGCTTTA  |
| Sal4         | CCATCCTTGCTCCAGCTATC | GCCGTTCCAAACTTCTACG   |
| Actin        | GTGGACATCTCTTGGGCACT | TCTGCAGGAGCGTACAGAAC  |
